# Supplementary material
Source: PubMed Central journal article supplement (PMC6646203)

*Supporting Information*

**Characterization of The Functional Changes in Mouse Gut Microbiome Associated with Increased *Akkermansia muciniphila* Population Modulated by Dietary Black Raspberries**

Pengcheng Tu<sup>1</sup>, Xiaoming Bian<sup>2</sup>, Liang Chi<sup>1</sup>, Bei Gao<sup>2</sup>, Hongyu Ru<sup>1</sup>, Thomas J Knobloch<sup>3,4</sup>,  
Christopher M. Weghorst<sup>3,4\*</sup>, and Kun Lu<sup>1\*</sup>

1. Department of Environmental Sciences and Engineering,  
University of North Carolina at Chapel Hill, Chapel Hill, NC, 27519, United States
2. Department of Environmental Health Science,  
University of Georgia, Athens, GA, 30602, United States
3. Division of Environmental Health Sciences,  
College of Public Health, Ohio State University, Columbus, OH, 43210, United States
4. Comprehensive Cancer Center, The Ohio State University, Columbus, OH, 43210, United States

\* Corresponding Authors

Kun Lu, PhD

Department of Environmental Sciences and Engineering

University of North Carolina at Chapel Hill, Chapel Hill, NC, 27599, United States

Tel: 919-966-7337

Email: [kunlu@unc.edu](mailto:kunlu@unc.edu)

and

Christopher M. Weghorst, PhD

Division of Environmental Health Sciences,

College of Public Health, Ohio State University, Columbus, OH, 43210, United States

Phone: 614-247-4942

Email: [weghorst.2@osu.edu](mailto:weghorst.2@osu.edu)

**Supplementary figures**

**Figure S1.** Gut microbial comparisons at phylum level in the BRB diet and control groups.

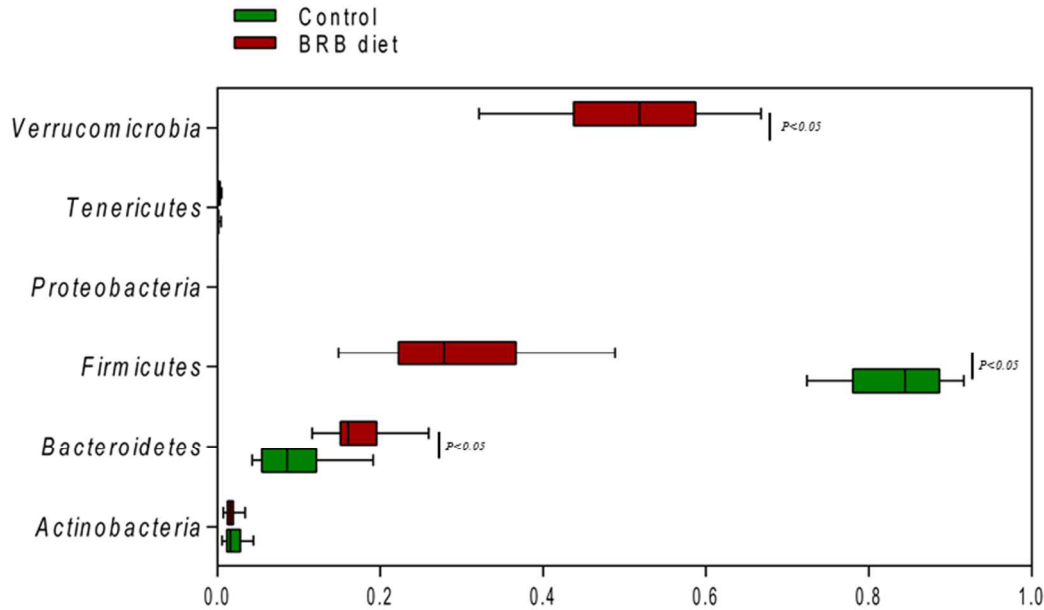

**Figure S2.** The fold changes of significantly altered gut bacterial genera in the BRB diet group compared to the control group, with 7 increased bacterial genera and 10 decreased genera.

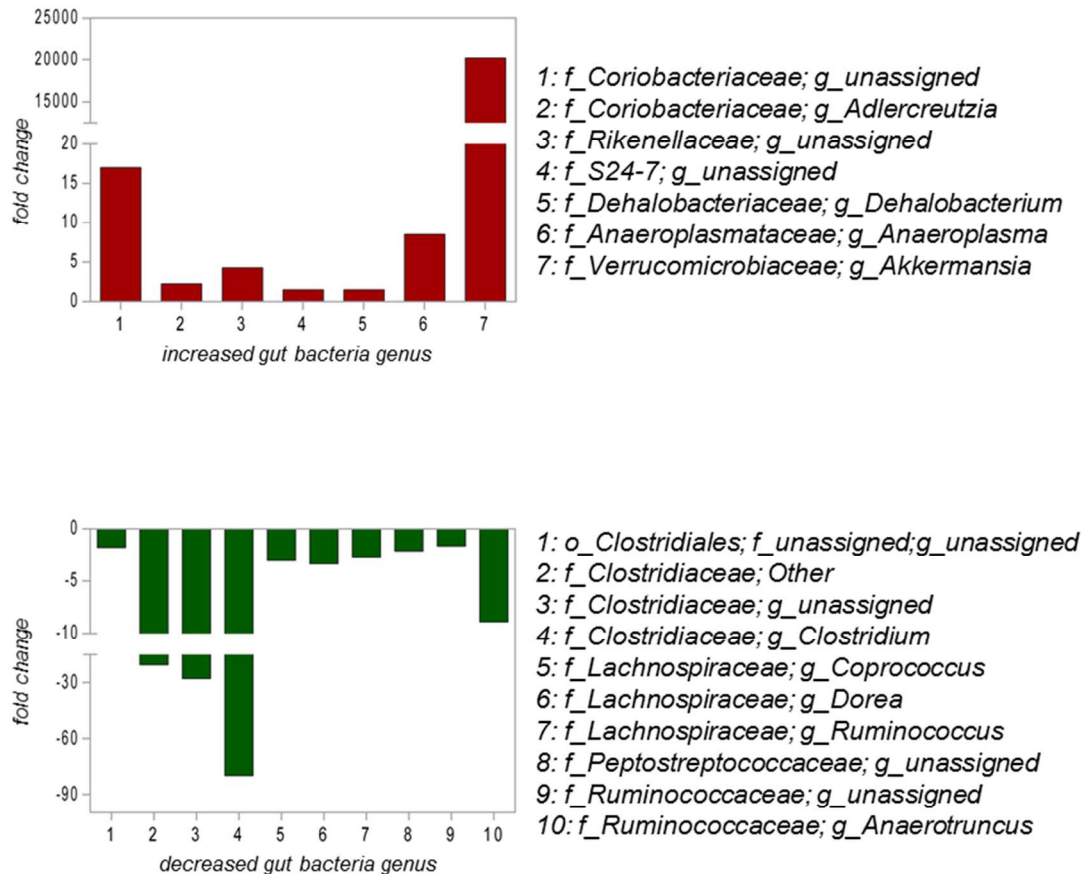

Supplement: ao8b00064_si_001.pdf [file ao8b00064_si_001.pdf]
